# Supplementary material
Source: Elsevier journal article supplement (https://www.sciencedirect.com/science/article/pii/S0211139X16301020)
Supplement: mmc1 [file S0211139X16301020:mmc1.docx]

**Tabla Suplementaria 1. Puntos de corte para fuerza de prensión de acuerdo a cuartiles de IMC y sexo y velocidad de la marcha según estatura y sexo.**

| Fuerza de prensión (kg) | | | | |
| --- | --- | --- | --- | --- |
| Cuartiles de IMC | Q1 | Q2 | Q3 | Q4 |
| Hombres | 20 | 22 | 24 | 24 |
| Mujeres | 12 | 14 | 13 | 14 |
| Velocidad de la marcha (m/s) | | | | |
| Grupos por estatura | Arriba de la media | | Por debajo de la media | |
| Hombres | 0.6 | | 0.48 | |
| Mujeres | 0.48 | | 0.48 | |

IMC: Índice de masa corporal, Q: Cuartil
